# Supplementary material
Source: Springer Nature journal article supplement (https://www.springermedizin.de/resource/supplementary/12884_2010_351_MOESM2_ESM.pdf/9457508)

## spontaneous vaginal birth, care provider 'catching' the baby:

■ gynaecologist  
(in-training)

■ midwife

■ other (GP, nurse)

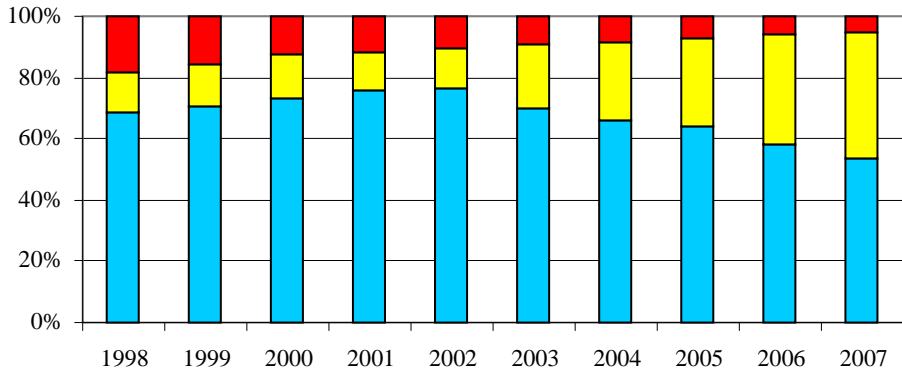

Supplement: MOESM2 [file 9457508]
